# Supplementary material for: How do hospitalised patients with Turkish migration background estimate their language skills and their comprehension of medical information – a prospective cross-sectional study and comparison to native patients in Germany to assess the language barrier and the need for translation
Source: PubMed Central journal article supplement (PMC3701570; doi:10.1186/1472-6963-13-196), 2013-05-28
Supplement: 1472-6963-13-196-S1.pdf [file 1472-6963-13-196-S1.pdf]

## **Questionnaire used in the evaluation of language competences in hospitalised patients with Turkish migration background in Germany and in native German controls.**

Additional material to the article “How do hospitalised patients with Turkish migration background estimate their language skills and comprehension of medical information – a prospective cross-sectional study and comparison to native patients in Germany to assess the importance of the language barrier and the need for translation.”

**Authors:** Arnd Giese, Müberra Uyar, Hacı Halil Uslucan,  
Stefan Becker, Bernhard Ferdinand Henning

**Corresponding author:** Dr. Arnd Giese  
Zentrale Patientenaufnahme/ Central Patient Admission  
Marienhospital Herne  
Universitätsklinikum der Ruhr-Universität Bochum  
Hölkeskampring 40  
44625 Herne  
Germany  
Tel.: +49 (0)2323 499-1551  
Fax: +49 (0)2323 499-394  
Email: arnd.giese@rub.de

## English version

Please note that an English version of the questionnaire was generated solely for the purpose of making the questions more understandable for an English-speaking readership and to facilitate translation into other languages.

### 1 Language preferences

#### 1.1 Which language do you usually speak at home?

German    Turkish    other language: \_\_\_\_\_

#### 1.2 Which language do you usually speak during leisure activities?

German    Turkish    other language: \_\_\_\_\_

#### 1.3 Which language do you usually speak at work?

German    Turkish    other language: \_\_\_\_\_

### 2 Self-rated German and Turkish linguistic proficiency and literacy

#### 2.1 How would you rate your German linguistic proficiency?

|          |     |         |      |           |
|----------|-----|---------|------|-----------|
| very bad | bad | average | good | very good |
| 1        | 2   | 3       | 4    | 5         |

#### 2.2 How would you rate your Turkish linguistic proficiency?

|          |     |         |      |           |
|----------|-----|---------|------|-----------|
| very bad | bad | average | good | very good |
| 1        | 2   | 3       | 4    | 5         |

**2.3 Is your German sufficient for your everyday-life activities (working, shopping in German stores, dealing with German authorities, communicating with a physician)?**

|                                                     |     |         |      |           |
|-----------------------------------------------------|-----|---------|------|-----------|
| very bad<br>(only with the help<br>of a translator) | bad | average | good | very good |
| 1                                                   | 2   | 3       | 4    | 5         |

**2.4 How well can you read and write in German?**

|          |     |         |      |           |
|----------|-----|---------|------|-----------|
| very bad | bad | average | good | very good |
| 1        | 2   | 3       | 4    | 5         |

**2.5 How well can you read and write in Turkish?**

|          |     |         |      |           |
|----------|-----|---------|------|-----------|
| very bad | bad | average | good | very good |
| 1        | 2   | 3       | 4    | 5         |

**3 Interaction between patient and physician in charge during rounds**

**3.1 How satisfied were you about the physician in charge informing you about your disease?**

|                  |             |                                      |           |                |
|------------------|-------------|--------------------------------------|-----------|----------------|
| very unsatisfied | unsatisfied | neither satisfied nor<br>unsatisfied | satisfied | very satisfied |
| 1                | 2           | 3                                    | 4         | 5              |

**3.2 How satisfied were you about the physician in charge informing you about diagnostic and therapeutic measures to be taken?**

|                  |             |                                      |           |                |
|------------------|-------------|--------------------------------------|-----------|----------------|
| very unsatisfied | unsatisfied | neither satisfied<br>nor unsatisfied | satisfied | very satisfied |
| 1                | 2           | 3                                    | 4         | 5              |

**3.3 How well did the physician answer your questions?**

|            |          |          |      |           |
|------------|----------|----------|------|-----------|
| not at all | a little | mediocre | well | very well |
| 1          | 2        | 3        | 4    | 5         |

**3.4 How well did you understand what the physician told you?**

|            |          |          |      |           |
|------------|----------|----------|------|-----------|
| not at all | a little | mediocre | well | very well |
| 1          | 2        | 3        | 4    | 5         |

**3.5 How much would it have helped you if somebody would have served as a German / Turkish interpreter?**

|            |          |          |      |           |
|------------|----------|----------|------|-----------|
| not at all | a little | mediocre | well | very well |
| 1          | 2        | 3        | 4    | 5         |

**4 Obtaining informed consent for invasive diagnostic or therapeutic procedures**

**4.1 Did you feel sufficiently informed of the procedure?**

|            |          |          |      |           |
|------------|----------|----------|------|-----------|
| not at all | a little | mediocre | much | very much |
| 1          | 2        | 3        | 4    | 5         |

**4.2 Did you have enough opportunity to get answers to your questions about the procedure?**

|            |          |          |      |           |
|------------|----------|----------|------|-----------|
| not at all | a little | mediocre | much | very much |
| 1          | 2        | 3        | 4    | 5         |

**4.3 If somebody acted as an interpreter - who did the translation of the physician's information?**

- a family member
- a friend
- another patient
- a Turkish-speaking nurse
- a Turkish-speaking physician

**4.3.1 Did you feel that the words of the physician were translated correctly and comprehensibly?**

|            |          |          |      |           |
|------------|----------|----------|------|-----------|
| not at all | a little | mediocre | much | very much |
| 1          | 2        | 3        | 4    | 5         |

**4.4 If nobody acted as an interpreter - how much better would a professional interpreter have helped you understand the Information given by the physician?**

|            |          |          |      |           |
|------------|----------|----------|------|-----------|
| not at all | a little | mediocre | much | very much |
| 1          | 2        | 3        | 4    | 5         |

## German version

Please note that only the questions 2.4, 3.1, 3.2, 3.3, 3.4, 4.1 and 4.2 were part of the questionnaire for native German controls without migration background. Including the remaining questions into the questionnaire below was done solely for the purpose of making the questions more understandable and to facilitate translation.

### 1 Language preferences

#### 1.1 Welche Sprache sprechen Sie zuhause am häufigsten?

deutsch                      türkisch                      andere Sprache: \_\_\_\_\_

#### 1.2 Welche Sprache sprechen Sie in Ihrer Freizeit am häufigsten:

deutsch                      türkisch                      andere Sprache: \_\_\_\_\_

#### 1.3 Welche Sprache sprechen oder sprachen Sie bei der Arbeit am häufigsten?

deutsch                      türkisch                      andere Sprache: \_\_\_\_\_

### 2 Self-rated German and Turkish linguistic proficiency and literacy

#### 2.1 Wie schätzen Sie Ihre deutschen Sprachkenntnisse ein?

|               |          |             |     |          |
|---------------|----------|-------------|-----|----------|
| sehr schlecht | schlecht | mittelmäßig | gut | sehr gut |
| 1             | 2        | 3           | 4   | 5        |

#### 2.2 Wie gut schätzen Sie Ihre türkischen Sprachkenntnisse ein?

|               |          |             |     |          |
|---------------|----------|-------------|-----|----------|
| sehr schlecht | schlecht | mittelmäßig | gut | sehr gut |
| 1             | 2        | 3           | 4   | 5        |

**2.3 Reichen Ihre Deutschkenntnisse für die Erledigungen des Alltages  
(Arbeit, Einkäufe in deutschen Geschäften, Behörden, Arzt)**

|                                       |          |             |     |          |
|---------------------------------------|----------|-------------|-----|----------|
| sehr schlecht<br>(nur mit Übersetzer) | schlecht | mittelmäßig | gut | sehr gut |
| 1                                     | 2        | 3           | 4   | 5        |

**2.4 Wie gut können Sie deutsch lesen und schreiben?**

|               |          |             |     |          |
|---------------|----------|-------------|-----|----------|
| sehr schlecht | schlecht | mittelmäßig | gut | sehr gut |
| 1             | 2        | 3           | 4   | 5        |

**2.5 Wie gut können Sie türkisch lesen und schreiben?**

|               |          |             |     |          |
|---------------|----------|-------------|-----|----------|
| sehr schlecht | schlecht | mittelmäßig | gut | sehr gut |
| 1             | 2        | 3           | 4   | 5        |

**3 Interaction between patient and physician in charge during rounds**

**3.1 Wie zufrieden sind Sie damit, wie man Sie im Rahmen der Visiten  
(Arztbesuch im Zimmer) über Ihre Erkrankung informiert hat?**

|                  |             |                                     |           |                |
|------------------|-------------|-------------------------------------|-----------|----------------|
| sehr unzufrieden | unzufrieden | weder zufrieden<br>noch unzufrieden | zufrieden | sehr zufrieden |
| 1                | 2           | 3                                   | 4         | 5              |

**3.2 Wie zufrieden sind Sie damit, wie man Sie im Rahmen der Visiten  
(Arztbesuch im Zimmer) über anstehende Untersuchungen und  
Behandlungen informiert hat?**

|                  |             |                                     |           |                |
|------------------|-------------|-------------------------------------|-----------|----------------|
| sehr unzufrieden | unzufrieden | weder zufrieden<br>noch unzufrieden | zufrieden | sehr zufrieden |
| 1                | 2           | 3                                   | 4         | 5              |

**3.3 Wie sehr ist der Arzt auf Ihre Fragen eingegangen?**

|                 |       |            |               |              |
|-----------------|-------|------------|---------------|--------------|
| überhaupt nicht | wenig | mäßig viel | ziemlich viel | äußerst viel |
| 1               | 2     | 3          | 4             | 5            |

**3.4 Wie gut haben Sie verstanden, was der Arzt bei der Visite gesagt hat?**

|                 |            |          |             |        |
|-----------------|------------|----------|-------------|--------|
| überhaupt nicht | eher nicht | halbwegs | überwiegend | völlig |
| 1               | 2          | 3        | 4           | 5      |

**3.5 Wie sehr hätte es ihnen geholfen, wenn jemand bei der Visite deutsch / türkisch übersetzt hätte?**

|                 |       |            |               |              |
|-----------------|-------|------------|---------------|--------------|
| überhaupt nicht | wenig | mäßig viel | ziemlich viel | äußerst viel |
| 1               | 2     | 3          | 4             | 5            |

**4 Obtaining informed consent for invasive diagnostic or therapeutic procedures**

**4.1 Falls bei Ihnen eine Aufklärung durch einen Arzt über eine Operation oder eine Untersuchung stattfand (z.B. Herzkatheter, Magen- oder Darmspiegelung, Narkose, Operation, Chemotherapie, Blutübertragung): Haben Sie sich durch die Aufklärung ausreichend aufgeklärt gefühlt?**

|                 |            |          |             |        |
|-----------------|------------|----------|-------------|--------|
| überhaupt nicht | eher nicht | halbwegs | überwiegend | völlig |
| 1               | 2          | 3        | 4           | 5      |

**4.2 Hatten Sie im Rahmen des Aufklärungsgesprächs ausreichend Möglichkeit, Fragen beantwortet zu bekommen?**

|                 |            |          |             |        |
|-----------------|------------|----------|-------------|--------|
| überhaupt nicht | eher nicht | halbwegs | überwiegend | völlig |
| 1               | 2          | 3        | 4           | 5      |

**4.3 Falls bei dem Aufklärungsgespräch jemand die Worte des Arztes für Sie übersetzt hat: Wer hat die Worte des Arztes Übersetzt?**

- jemand aus meiner Familie
- jemand aus meinem Freundes- oder Bekanntenkreis
- ein anderer Patient
- eine türkischsprachige Schwester / Krankenpfleger
- eine türkischsprachiger Ärztin / Arzt

**4.3.1 Hatten Sie das Gefühl, dass der Übersetzer die Worte des Arztes korrekt und verständlich wiedergegeben hat?**

|                 |            |          |             |        |
|-----------------|------------|----------|-------------|--------|
| überhaupt nicht | eher nicht | halbwegs | überwiegend | völlig |
| 1               | 2          | 3        | 4           | 5      |

**4.4 Falls niemand die Worte des Arztes übersetzte: Wie viel mehr hätte ein professioneller Dolmetscher Ihnen helfen können, den Inhalt des Aufklärungsgesprächs zu verstehen?**

|                 |       |            |               |              |
|-----------------|-------|------------|---------------|--------------|
| überhaupt nicht | wenig | mäßig viel | ziemlich viel | äußerst viel |
| 1               | 2     | 3          | 4             | 5            |

## Turkish version

### 1 Language preferences

#### 1.1 Evde çoğunlukla konuştuğunuz dil?

Almanca  Türkçe  Başka bir dil: \_\_\_\_\_

#### 1.2 Boş zamanlarınızda çoğunlukla hangi dili konuşuyorsunuz?

Almanca  Türkçe  Başka bir dil: \_\_\_\_\_

#### 1.3 İş yerinde çoğunlukla hangi dili konuşuyorsunuz veya konuştunuz?

Almanca  Türkçe  Başka bir dil: \_\_\_\_\_

### 2 Self-rated German and Turkish linguistic proficiency and literacy

#### 2.1 Almanca bilginizi nasıl buluyorsunuz?

|          |            |                |             |         |
|----------|------------|----------------|-------------|---------|
| Çok kötü | Biraz kötü | Ne iyi ne kötü | Oldukça iyi | Çok iyi |
| 1        | 2          | 3              | 4           | 5       |

#### 2.2 Türkçe bilginizi nasıl buluyorsunuz?

|          |            |                |             |         |
|----------|------------|----------------|-------------|---------|
| Çok kötü | Biraz kötü | Ne iyi ne kötü | Oldukça iyi | Çok iyi |
| 1        | 2          | 3              | 4           | 5       |

#### 2.3 Almancanız günlük yaşamınızda yeterli mi? (İşyerinde, alışverişte, Alman resmi dairelerinde, doktorda)

|                                                      |                |                          |                 |                 |
|------------------------------------------------------|----------------|--------------------------|-----------------|-----------------|
| Tamamen yetersiz<br>(Tercüman yardımı<br>gerekliyor) | Biraz yetersiz | Orta derecede<br>yeterli | Oldukça yeterli | Tümüyle yeterli |
| 1                                                    | 2              | 3                        | 4               | 5               |

#### 2.4 Almanca okuma- ve yazmanız nasıl?

|          |            |                |             |         |
|----------|------------|----------------|-------------|---------|
| Çok kötü | Biraz kötü | Ne iyi ne kötü | Oldukça iyi | Çok iyi |
| 1        | 2          | 3              | 4           | 5       |

#### 2.5 Türkçe okuma- ve yazmanız nasıl?

|          |            |                |             |         |
|----------|------------|----------------|-------------|---------|
| Çok kötü | Biraz kötü | Ne iyi ne kötü | Oldukça iyi | Çok iyi |
| 1        | 2          | 3              | 4           | 5       |

### 3 Interaction between patient and physician in charge during rounds

#### 3.1 Hastanedeki doktorun / doktorların hastalığınızla ilgili bilgilendirmesinden ne kadar memnunsunuz?

|                    |                 |                       |                  |              |
|--------------------|-----------------|-----------------------|------------------|--------------|
| Hiç memnun değilim | Çok az memnunum | Orta düzeyde memnunum | Oldukça memnunum | Çok memnunum |
| 1                  | 2               | 3                     | 4                | 5            |

#### 3.2 Hastanedeki doktorun / doktorların size uygulanacak muayene ve tedavi ile ilgili bilgilendirmesinden ne kadar memnunsunuz?

|                    |                 |                       |                  |              |
|--------------------|-----------------|-----------------------|------------------|--------------|
| Hiç memnun değilim | Çok az memnunum | Orta düzeyde memnunum | Oldukça memnunum | Çok memnunum |
| 1                  | 2               | 3                     | 4                | 5            |

#### 3.3 Doktor / doktorlar sorularınızla ne kadar iyi ilgilendi / cevapladı?

|     |        |               |         |     |
|-----|--------|---------------|---------|-----|
| Hiç | Çok az | Orta derecede | Oldukça | Çok |
| 1   | 2      | 3             | 4       | 5   |

#### 3.4 Hastanedeki doktorun söylediklerini ne kadar iyi anladınız?

|               |                |                       |                |                |
|---------------|----------------|-----------------------|----------------|----------------|
| Hiç anlamadım | Çok az anladım | Orta derecede anladım | Çoğunu anladım | Tümünü anladım |
| 1             | 2              | 3                     | 4              | 5              |

**3.5 Doktorun söylediklerini biri size tercüme etseydi ne kadar yardım etmiş olurdu?**

|     |        |               |         |     |
|-----|--------|---------------|---------|-----|
| Hiç | Çok az | Orta derecede | Oldukça | Çok |
| 1   | 2      | 3             | 4       | 5   |

**4 Obtaining informed consent for invasive diagnostic or therapeutic procedures**

**4.1 Bir doktor tarafından ameliyat veya muayene için size detaylı bilgi verildi mi (Örneğin: Kalp anjiyosu, Mide- veya bağırsak- endoskopisi, narkoz, ameliyat, kemoterapi, kan nakli)? Cevabınız evet ise: Size verilen bilgiler sizi tatmin etti mi?**

|     |        |               |         |     |
|-----|--------|---------------|---------|-----|
| Hiç | Çok az | Orta derecede | Oldukça | Çok |
| 1   | 2      | 3             | 4       | 5   |

**4.2 Detaylı bilgilendirme görüşmesi çerçevesinde sorularınıza yeterli cevap alabilme imkanı buldunuz mu?**

|     |        |               |       |         |
|-----|--------|---------------|-------|---------|
| Hiç | Çok az | Orta derecede | Çokça | Tamamen |
| 1   | 2      | 3             | 4     | 5       |

**4.3 Detaylı bilgi görüşmesinde biri size doktorun söylediklerini tercüme etti mi? Cevabınız evet ise: Doktorun söylediklerini kim tercüme etti?**

- Ailemden biri
- Arkadaş- / tanıdık çevremden biri
- Başka bir hasta
- Türkçe konuşabilen bir hemşire / hastabakıcı
- Türkçe konuşabilen bir doktor

4.3.1 *Tercüme eden kişinin doktorun sözlerini doğru ve anlaşılır tercüme ettiği kanaati sizde oluştu mu?*

|     |        |               |         |     |
|-----|--------|---------------|---------|-----|
| Hiç | Çok az | Orta derecede | Oldukça | Çok |
| 1   | 2      | 3             | 4       | 5   |

4.4 *Detaylı bilgi görüşmesinde biri size doktorun söylediklerini tercüme etti mi? Cevabınız hayır ise: Profesyonel bir tercüman size detaylı bilgi görüşmesinin içeriğini anlamada daha ne kadar yardım edebilirdi?*

|     |        |               |         |     |
|-----|--------|---------------|---------|-----|
| Hiç | Çok az | Orta derecede | Oldukça | Çok |
| 1   | 2      | 3             | 4       | 5   |
